# Supplementary material for: Underestimation of Thermogenic Methane Emissions in New York City
Source: PubMed Central journal article supplement (PMC11137862; doi:10.1021/acs.est.3c10307), 2024-05-14
Supplement: es3c10307_si_002.pdf [file es3c10307_si_002.pdf]

# Supporting information for “Underestimation of thermogenic methane emissions in New York City”

*Joseph R. Pitt<sup>1,§,\*</sup>, Israel Lopez-Coto<sup>2,1,\*</sup>, Anna Karion<sup>2</sup>, Kristian D. Hajny<sup>1,3</sup>, Jay Tomlin<sup>3</sup>, Robert Kaeser<sup>3</sup>, Thilina Jayarathne<sup>3,†</sup>, Brian H. Stirm<sup>4</sup>, Cody R. Floerchinger<sup>5</sup>, Christopher P. Loughner<sup>6</sup>, Róisín Commane<sup>7</sup>, Conor K. Gately<sup>5,8,‡</sup>, Lucy R. Hutyra<sup>8</sup>, Kevin R. Gurney<sup>9</sup>, Geoffrey S. Roest<sup>9</sup>, Jianming Liang<sup>10</sup>, Sharon Gourdjii<sup>2,^</sup>, Kimberly L. Mueller<sup>2</sup>, James R. Whetstone<sup>2</sup>, Paul B. Shepson<sup>1,3</sup>*

<sup>1</sup>School of Marine and Atmospheric Sciences, Stony Brook University, Stony Brook, NY 11794, USA

<sup>2</sup>National Institute of Standards and Technology, Gaithersburg, MD 20899, USA

<sup>3</sup>Department of Chemistry, Purdue University, West Lafayette, IN 47907, USA

<sup>4</sup>School of Aviation and Transportation Technology, Purdue University, West Lafayette, IN 47906, USA

<sup>5</sup>Department of Earth and Planetary Sciences, Harvard University, Cambridge, MA 02138, USA

<sup>6</sup>Air Resources Laboratory, NOAA, College Park, MD 20740, USA

<sup>7</sup>Dept. of Earth and Environmental Sciences, Lamont-Doherty Earth Observatory, Columbia University, Palisades, NY 10964, USA

<sup>8</sup>Department of Earth and Environment, Boston University, Boston, MA 02215, USA

<sup>9</sup>School of Informatics, Computing and Cyber Systems, Northern Arizona University, Flagstaff, AZ 86011, USA

<sup>10</sup>Environmental Systems Research Institute, Redlands, CA 92373, USA

<sup>§</sup>Current address: School of Chemistry, University of Bristol, Bristol, BS8 1TS, UK

<sup>†</sup>Current address: Bristol Myers Squibb, New Brunswick, NJ 08901, USA

<sup>‡</sup>Current address: Metropolitan Area Planning Council, Boston, MA 02111, USA

<sup>^</sup>Current address: Moody's RMS, Detroit, MI 48214, USA

Email: joseph.pitt@bristol.ac.uk, israel.lopezcoto@nist.gov

Number of pages: 30

Number of figures: 9

Number of tables: 6

## 25 **S1: Inventory methodological details**

26 This section contains five tables that provide extra information regarding the high-resolution  
27 inventory (d03 domain). Details of each table are given in the corresponding caption. Below we  
28 include descriptions of:

- 29 • emissions from natural gas transmission (not associated with compressor stations).
- 30 • the inland water fluxes (rivers and lakes).
- 31 • the calculation of natural fluxes (wetlands and inland waters) within the d01 domain.
- 32 • a list of the “other” sectors taken straight from the gridded Environmental Protection  
33 Agency (GEPA) inventory.<sup>1</sup>
- 34 • the methodology used to estimate the number of people using onsite wastewater  
35 treatment systems within each state.

36

### 37 **Natural gas transmission**

38 Emissions from natural gas transmission not associated with compressor stations include the  
39 following sub-sectors from the EPA NIR<sup>2</sup>: Pipeline Leaks; M&R (Trans. Co. Interconnect); M&R  
40 (Farm Taps + Direct Sales); and Pipeline Venting. Emissions from these sub-sectors were allocated  
41 uniformly along transmission pipelines, using pipeline locations published by the EIA.<sup>3</sup> The  
42 emission rate per unit length of pipeline (given in Table S1.2) was calculated by dividing the total  
43 national emissions for these four sub-sectors by the total length of pipeline reported in the EPA  
44 NIR.<sup>2</sup>

45

### 46 **Inland waters**

47 Locations of rivers and lakes were taken from the National Wetlands Inventory (NWI).<sup>4</sup>  
48 Rosentreter et al.<sup>5</sup> reported median lake fluxes that depend strongly on lake size, with much larger  
49 fluxes from smaller lakes. However, McDonald et al.<sup>6</sup> showed that large lakes (> 1 km<sup>2</sup>) constitute  
50 71 % of the total lake area in the contiguous US, rising to 90 % if the Great Lakes are included.  
51 Therefore, all lake classes in the NWI (i.e., classes beginning with L) were assigned a flux of 5.00  
52 gCH<sub>4</sub> m<sup>-2</sup> yr<sup>-1</sup>, given as the median flux for lakes larger than 1 km<sup>2</sup> by Rosentreter et al.<sup>5</sup>. Similarly,  
53 all river classes in the NWI (i.e., classes beginning with R) were assigned a flux of 7.88 gCH<sub>4</sub> m<sup>-2</sup>  
54 yr<sup>-1</sup>, given as the median flux for rivers by Rosentreter et al.<sup>5</sup>

55 **Natural emissions in the d01 domain**

56 In the large, coarse, d01 domain, anthropogenic emissions were taken from the GEPA (regridded  
57 to  $0.08^\circ \times 0.08^\circ$  using a conservative regridding scheme, described by Pitt et al.).<sup>7,8</sup> Natural  
58 emissions (i.e., wetlands and inland waters) in the d01 domain were calculated (on a  $0.08^\circ \times 0.08^\circ$   
59 grid) following the same approach as used for the d03 natural emission maps. Emissions from  
60 rivers and lakes were only calculated for the US part of the domain (as the NWI is not available  
61 for Canada). Canadian wetland emissions were calculated based on cold-season values from  
62 WetCHARTs v1.3.1,<sup>9</sup> spatially downscaled using the 2015 Land Cover of Canada.<sup>10</sup> In the US,  
63 the wetland emission map used for the d01 domain corresponded to the wetland map used for the  
64 d03 domain for a given model simulation. However, Canadian emissions were based on this  
65 WetCHARTs-derived emission map in all cases (i.e., even when US wetland emissions were  
66 derived based on SOCCR1<sup>11</sup>/SOCCR2<sup>12,13</sup> fluxes and NWI<sup>4</sup> land cover), but with Canadian  
67 emissions rescaled by the ratio of the mean flux within the US part of the d01 domain to the mean  
68 WetCHARTS-derived flux for the same area. This ensured that there were no spurious step  
69 changes in wetland emission magnitude at the US-Canada border when US emissions were  
70 calculated based on SOCCR1 or SOCCR2 values.

71

72 **Other emissions**

73 The “Other” sector (see Table S1.1) consists of a number of minor-emitting sub-sectors that  
74 were taken directly from the GEPA.<sup>1</sup> These sectors were labelled in the GEPA as:

- 75 • 1A\_Combustion\_Mobile
- 76 • 1B1a\_Abandoned\_Coal
- 77 • 1B1a\_Coal\_Mining\_Surface
- 78 • 1B1a\_Coal\_Mining\_Underground
- 79 • 1B2a\_Petroleum
- 80 • 1B2b\_Natural\_Gas\_Processing
- 81 • 1B2b\_Natural\_Gas\_Production
- 82 • 2B5\_Petrochemical\_Production
- 83 • 2C2\_Ferroalloy\_Production
- 84 • 4A\_Enteric\_Fermentation
- 85 • 4B\_Manure\_Management

- 86 • 4C\_Rice\_Cultivation
- 87 • 4F\_Field\_Burning
- 88 • 5\_Forest\_Firest
- 89 • 6D\_Composting

90

91 **Onsite wastewater treatment**

92 To estimate the number of people using onsite systems at the state level, US Census state  
93 population estimates for 2019<sup>14</sup> were multiplied by an estimate of the fraction of people served by  
94 onsite systems. For New York state, this septic fraction estimate (16.1 %) was taken from the 2019  
95 American Housing Survey.<sup>15</sup> Such recent data was not available for the other four states (CT, NJ,  
96 PA, DE) that intersect the domain. In those cases, the septic fraction reported in the 1990 US  
97 Census<sup>16</sup> (the last to provide this data at the individual state level) was used. To correct for recent  
98 changes in septic fraction, these state-level values from 1990 were multiplied by the ratio of whole-  
99 US septic fraction in 2019 (16.3 %; from the American Housing Survey) to whole-US septic  
100 fraction in 1990 (24.1 %).

| Sector                             | No. of subsectors | Classification  | No. of variants |
|------------------------------------|-------------------|-----------------|-----------------|
| Landfills                          | 2                 | Non-thermogenic | 1               |
| Wetlands and inland waters         | 3                 | Non-thermogenic | 3               |
| Natural gas distribution           | 5                 | Thermogenic     | 6               |
| Natural gas residential post meter | 1                 | Thermogenic     | 6               |
| Natural gas transmission           | 2                 | Thermogenic     | 1               |
| Stationary combustion              | 4                 | Mixed           | 4               |
| Wastewater                         | 2                 | Non-thermogenic | 2               |
| Other (taken straight from GEPA)   | 15                | Mixed           | 1               |

101 **Table S1.1:** Summary of the top-level sectoral breakdown of the high-resolution inventory,  
102 including the number of individual subsector maps that comprise each sector and the number of  
103 alternative variants constructed.

| Sector                             | Sub-sector          | Type                                                                        | Emission factor                               | Reference             |
|------------------------------------|---------------------|-----------------------------------------------------------------------------|-----------------------------------------------|-----------------------|
| Natural gas distribution           | M&R stations        | M&R, inlet > 300 psig                                                       | 2143 kg station <sup>-1</sup>                 | EPA 2021 <sup>2</sup> |
|                                    |                     | M&R, inlet 100-300 psig                                                     | 995 kg station <sup>-1</sup>                  |                       |
|                                    |                     | M&R, inlet < 100 psig                                                       | 727 kg station <sup>-1</sup>                  |                       |
|                                    |                     | Regulating, inlet > 300 psig                                                | 869 kg station <sup>-1</sup>                  |                       |
|                                    |                     | Regulating, inlet 100-300 psig                                              | 143 kg station <sup>-1</sup>                  |                       |
|                                    |                     | Regulating, inlet 40-100 psig                                               | 164 kg station <sup>-1</sup>                  |                       |
|                                    |                     | Regulating, below grade                                                     | 51 kg station <sup>-1</sup>                   |                       |
|                                    | Maintenance/upsets  | Pressure relief valves                                                      | 1.0 kg (mile of mains pipeline) <sup>-1</sup> | EPA 2021 <sup>2</sup> |
|                                    |                     | Pipeline blowdown                                                           | 2.0 kg (mile of all pipeline) <sup>-1</sup>   |                       |
|                                    |                     | Mishaps                                                                     | 30.6 kg (mile of all pipeline) <sup>-1</sup>  |                       |
|                                    | Service Pipelines   | Unprotected steel                                                           | 14.5 kg service <sup>-1</sup>                 | EPA 2021 <sup>2</sup> |
|                                    |                     | Cathodically protected steel                                                | 1.3 kg service <sup>-1</sup>                  |                       |
|                                    |                     | Plastic                                                                     | 0.3 kg service <sup>-1</sup>                  |                       |
|                                    |                     | Copper                                                                      | 4.9 kg service <sup>-1</sup>                  |                       |
|                                    | Consumer Meters     | Residential                                                                 | 1.5 kg meter <sup>-1</sup>                    | EPA 2021 <sup>2</sup> |
|                                    |                     | Commercial                                                                  | 23.4 kg meter <sup>-1</sup>                   |                       |
|                                    |                     | Industrial                                                                  | 105 kg meter <sup>-1</sup>                    |                       |
| Mains Pipelines                    | Bare steel          | 0.51 leaks mile <sup>-1</sup> , 2.24 g min <sup>-1</sup> leak <sup>-1</sup> | Weller et al. <sup>17</sup>                   |                       |
|                                    | Cast iron           | 1.00 leaks mile <sup>-1</sup> , 1.72 g min <sup>-1</sup> leak <sup>-1</sup> |                                               |                       |
|                                    | Coated steel        | 0.61 leaks mile <sup>-1</sup> , 2.00 g min <sup>-1</sup> leak <sup>-1</sup> |                                               |                       |
|                                    | Plastic             | 0.43 leaks mile <sup>-1</sup> , 2.03 g min <sup>-1</sup> leak <sup>-1</sup> |                                               |                       |
| Natural gas residential post meter |                     | 0.5 % of residential consumption                                            | Fischer et al. <sup>18</sup>                  |                       |
| Natural gas transmission           | Compressor stations |                                                                             | 1.09 mol/s/station (default)                  | EPA 2021 <sup>2</sup> |
|                                    | Other               |                                                                             | 1.20 μmol/m/s                                 |                       |

104 **Table S1.2:** Emission factors for natural gas sectors

| Stationary combustion sub-sector | Fuel        | EPA NIR correction | Gross calorific value to net calorific value | Energy unit (TJ MMBtu <sup>-1</sup> ) | Emission factor (kg TJ <sup>-1</sup> ) | Emission factor (g MMBtu <sup>-1</sup> ) |
|----------------------------------|-------------|--------------------|----------------------------------------------|---------------------------------------|----------------------------------------|------------------------------------------|
| Residential                      | Coal        | --                 | --                                           | --                                    | --                                     | --                                       |
|                                  | Petroleum   | 0.87               | 0.95                                         | 1/947.8                               | 10                                     | --                                       |
|                                  | Natural gas | --                 | --                                           | --                                    | --                                     | --                                       |
|                                  | Wood        | 0.97               | 0.9                                          | 1/947.8                               | 300                                    | --                                       |
| Commercial                       | Coal        | 1.02               | 0.95                                         | 1/947.8                               | 10                                     | --                                       |
|                                  | Petroleum   | 0.89               | 0.95                                         | 1/947.8                               | 10                                     | --                                       |
|                                  | Natural gas | 1.0                | 0.9                                          | 1/947.8                               | 5                                      | --                                       |
|                                  | Wood        | 0.68               | 0.9                                          | 1/947.8                               | 300                                    | --                                       |
| Industrial                       | Coal        | 0.46               | 0.95                                         | 1/947.8                               | 10                                     | --                                       |
|                                  | Petroleum   | 0.24               | 0.95                                         | 1/947.8                               | 3                                      | --                                       |
|                                  | Natural gas | 0.89               | 0.9                                          | 1/947.8                               | 1                                      | --                                       |
|                                  | Wood        | 0.90               | 0.9                                          | 1/947.8                               | 30                                     | --                                       |
| Electricity Production           | Coal        | 1.04               | 0.95                                         | 1/947.8                               | 1                                      | --                                       |
|                                  | Petroleum   | 0.22               | 0.95                                         | 1/947.8                               | 3                                      | --                                       |
|                                  | Natural gas | 0.99               | --                                           | --                                    | --                                     | 5.4                                      |
|                                  | Wood        | 0.15               | 0.9                                          | 1/947.8                               | 30                                     | --                                       |

105 **Table S1.3:** Multiplicative factors used to convert from SEDS energy consumption estimates to annual CH<sub>4</sub> emissions for the stationary  
106 combustion subsectors. Emission factors in kg TJ<sup>-1</sup> are default IPCC<sup>19</sup> values, while the emission factor for electricity production from  
107 natural gas (g MMBtu<sup>-1</sup>) is taken from Hajny et al.<sup>20</sup> There is no reported residential coal use, and emissions from residential natural gas  
108 use are considered in the separate sector: Natural gas residential post meter.

| Sector                     | Sub-sector | Type                           | Emission factor                                                              | Reference                                       |
|----------------------------|------------|--------------------------------|------------------------------------------------------------------------------|-------------------------------------------------|
| Wetlands and inland waters | Wetland    | See Table S1.5                 | See Table S1.5                                                               | See Table S1.5                                  |
|                            | River      |                                | 21.6 mg m <sup>-2</sup> day <sup>-1</sup>                                    | Rosentreter et al. <sup>5</sup>                 |
|                            | Lake       |                                | 13.7 mg m <sup>-2</sup> day <sup>-1</sup>                                    |                                                 |
| Landfills                  | Municipal  | Reporting to GHGRP             | N/A (GHGRP emissions)                                                        | GHGRP <sup>21</sup>                             |
|                            |            | Not reporting to GHGRP         | 0.52 mol s <sup>-1</sup> landfill <sup>-1</sup>                              | EPA 2021 <sup>2</sup> ; LMOP <sup>22</sup>      |
|                            | Industrial |                                | N/A (GEPA emissions)                                                         | GEPA <sup>1</sup>                               |
| Wastewater                 | Domestic   | Centralised (treatment plants) | 0.019 mol s <sup>-1</sup> (million gallons day <sup>-1</sup> ) <sup>-1</sup> | EPA 2021 <sup>2</sup> ; CWNS 2012 <sup>23</sup> |
|                            |            | Onsite (e.g., septic tanks)    | 10.7 g day <sup>-1</sup> (person using onsite system) <sup>-1</sup>          | EPA 2021 <sup>2</sup>                           |
|                            | Industrial |                                | N/A (GHGRP emissions)                                                        | GHGRP <sup>21</sup>                             |

109 **Table S1.4:** Emission factors for non-thermogenic sectors.



| Wetland Type             | NWI code starting | SOCCR1 flux (g m <sup>-2</sup> yr <sup>-1</sup> ) | SOCCR2 flux (g m <sup>-2</sup> yr <sup>-1</sup> ) |
|--------------------------|-------------------|---------------------------------------------------|---------------------------------------------------|
| Intertidal               | E2 or M2          | 1.3                                               | 20.44                                             |
| Terrestrial forested     | PFO               | 7.6                                               | 24.76                                             |
| Terrestrial non-forested | P (except PFO)    | 7.6                                               | 26.34                                             |

110 **Table S1.5:** Fluxes for the different wetland types calculated using data from the First State of the  
111 Carbon Cycle Report (SOCCR1)<sup>11</sup> and the Second State of the Carbon Cycle Report  
112 (SOCCR2).<sup>12,13</sup>

## 113 **S2: Comparison of high-resolution inventory versions**

114 A comparison between selected versions of the high-resolution inventory and a selection of  
115 lower resolution ( $0.1^\circ$ ) pre-existing inventories is shown in Figure S2.1. Here we have focussed  
116 on the correlation coefficient ( $r^2$ ) as a measure of the accuracy of the spatial distribution of  
117 emissions. An accurate prior spatial distribution is important in any inversion, but it is especially  
118 so for the sectoral inverse modelling approach, in which the spatial distribution for the three  
119 components (urban area thermogenic emissions, urban area non-thermogenic emissions, and  
120 emissions outside the urban area) are fixed.

121 The four versions of the high-resolution inventory that have been used in the analysis presented  
122 in the main manuscript are indicated in Figure S2.1 as “HRA”, “HRB”, “HRC” and “HRD”. A  
123 standardised naming convention is followed, whereby high-resolution inventory versions are  
124 denoted *AA\_BBB\_CC\_DD*:

- 125 • *AA* denotes the spatial proxy used for natural gas distribution/post-meter emissions
  - 126 ○ A1 = state-level emissions distributed using ACES
  - 127 ○ A5 = 5-state-level emissions distributed using ACES
  - 128 ○ AL = LDC-level emissions distributed using ACES
  - 129 ○ V1 = state-level emissions distributed using Vulcan
  - 130 ○ V5 = 5-state-level emissions distributed using Vulcan
  - 131 ○ VL = LDC-level emissions distributed using Vulcan
- 132 • *BBB* denotes the spatial proxy used for stationary combustions emissions:
  - 133 ○ AS1 = state-level emissions distributed using ACES
  - 134 ○ AS5 = 5-state-level emissions distributed using ACES
  - 135 ○ VS1 = state-level emissions distributed using Vulcan
  - 136 ○ VS5 = 5-state-level emissions distributed using Vulcan
- 137 • *CC* denotes the wetland emission map:
  - 138 ○ WC = WetCHARTs fluxes downscaled using NLCD landcover
  - 139 ○ S1 = SOCCR1 fluxes applied to NWI wetland classes
  - 140 ○ S2 = SOCCR2 fluxes applied to NWI wetland classes
- 141 • *DD* denotes the onsite wastewater treatment emission level:
  - 142 ○ SN = National emissions distributed using NLCD landcover
  - 143 ○ SS = State-level emissions distributed using NLCD landcover

144 Anthropogenic emissions from the pre-existing inventories were combined with natural  
145 emissions (wetlands, rivers and lakes) from the high-resolution inventory prior to this analysis.  
146 The wetland emission maps used in each case are denoted following the same convention as used  
147 for the high-resolution inventory versions (see code description above). The anthropogenic  
148 emissions are denoted as follows:

- 149 • ED4 = anthropogenic emissions from EDGAR v4.2<sup>24</sup>
- 150 • ED5 = anthropogenic emissions from EDGAR v5<sup>25,26</sup>
- 151 • EPA = anthropogenic emissions from the GEPA<sup>1</sup>

152 Fluxes within the d01 domain were also included in the calculation of the modelled timeseries,  
153 for all cases shown in Figure S2.1 (i.e., both the high-resolution and pre-existing inventories).  
154 Anthropogenic emissions in d01 were taken from the GEPA in all cases; see SI Section S1 for a  
155 description of how d01 natural emissions were calculated.

156 Each boxplot consists of results from the 9 flights (after averaging across the transport model  
157 ensemble for each flight). The vast majority of high-resolution inventory versions resulted in  
158 higher mean and median correlation coefficients than the pre-existing inventories. The analysis in  
159 the main paper focusses on the high-resolution inventory versions HRA, HRB, HRC and HRD.  
160 HRA and HRC were selected on the basis that they had the highest mean and median  $r^2$  values,  
161 respectively. In principle it should be more accurate to calculate natural gas, stationary combustion  
162 and onsite wastewater treatment emissions over the smallest possible spatial area before  
163 disaggregating using a spatial proxy. After filtering according to these criteria, we also wanted to  
164 carry forward one prior where Vulcan had been used as a spatial proxy and another where ACES  
165 had been used as a spatial proxy. HRB and HRD were therefore selected because they had the  
166 highest median  $r^2$  values of the filtered versions that used ACES and Vulcan respectively.

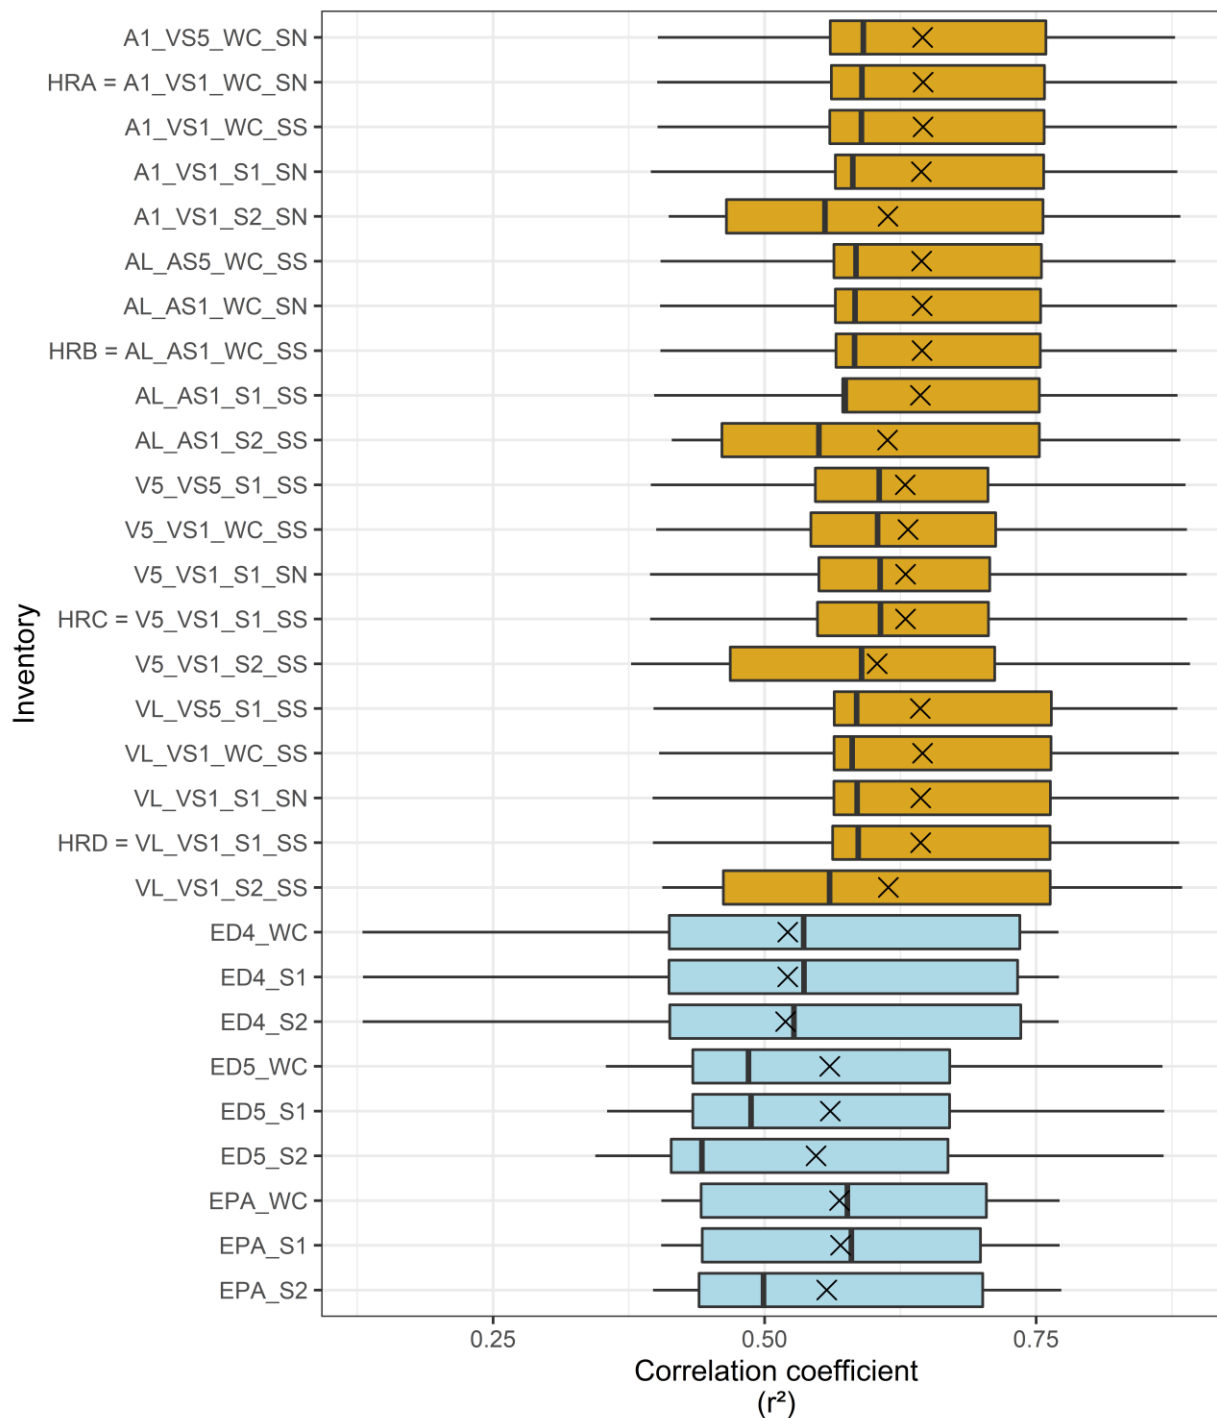

167 **Figure S2.1:** Correlation coefficient between the measured mole fraction timeseries and modelled  
 168 mole fraction timeseries using a variety of d03 inventory (prior) emissions. This plot contains a  
 169 subset of the 144 possible combinations of the high-resolution inventory (gold bars) as well as a  
 170 selection of lower resolution (0.1°) pre-existing inventories (blue bars). Boxplot convention is  
 171 described in the caption of Figure S5.4.

### 172 **S3: Aircraft measurements**

173 The CH<sub>4</sub> mole fraction measurements used in this study were made using a Picarro\* Cavity  
174 Ringdown Spectrometer (either model G2301-f or G2301-m, depending on the flight).<sup>27</sup> These  
175 measurements are traceable to the WMO X2004A CH<sub>4</sub> scale<sup>28</sup> via the in-flight sampling of three  
176 calibration cylinders, provided by NOAA, with a typical precision of 3 nmol mol<sup>-1</sup> for CH<sub>4</sub>. The  
177 data acquisition interval was between 1.2 and 2.3 seconds, depending on the specific analyser used  
178 on a given flight. The flights were all conducted during the months of November, February or  
179 March. The flight tracks, flight dates and flight times are shown in Figure S3.1, along with the  
180 aggregate footprint for each flight.

181

182

183

184 \*Certain commercial equipment, instruments, or materials are identified in this paper in order to  
185 specify the experimental procedure adequately. Such identification is not intended to imply  
186 recommendation or endorsement by NIST nor is it intended to imply that the materials or  
187 equipment identified are necessarily the best available for the purpose.

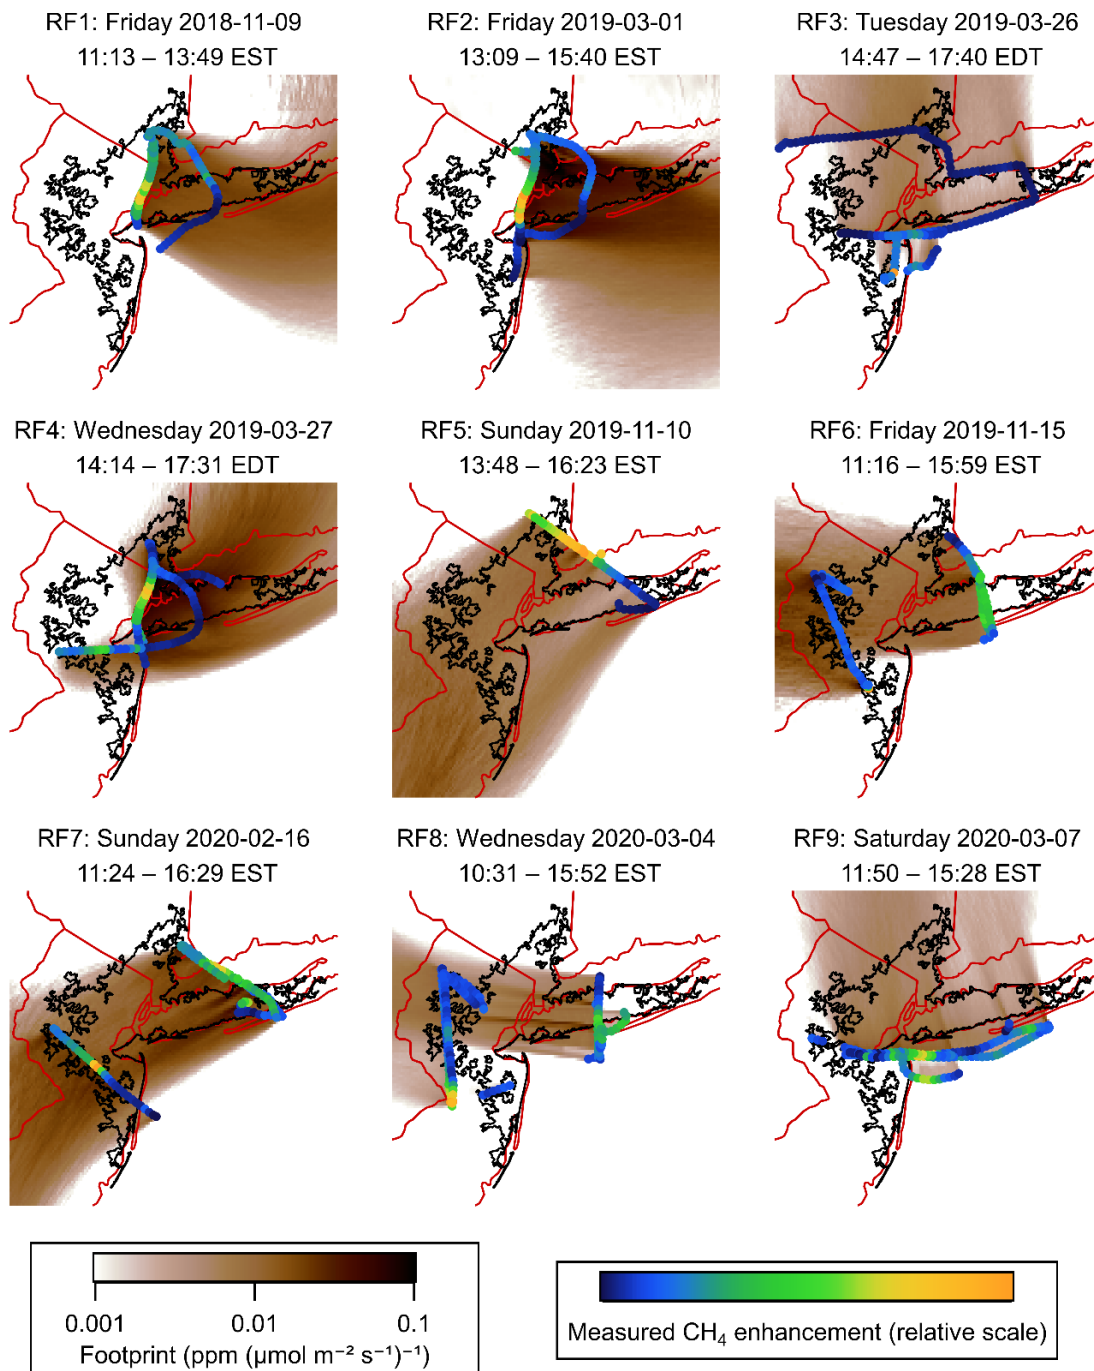

188 **Figure S3.1:** Flight tracks for each day, coloured by measured CH<sub>4</sub> enhancement. The aggregate  
 189 footprint for each flight is also shown (using ERA5 meteorology and Kantha and Clayton<sup>29</sup>  
 190 turbulence parameterisation), using a logarithmic scale saturated at the limits indicated. State  
 191 boundaries are shown in red and the NY-UA is outlined in black. Flight times are given in local  
 192 time. This figure has been adapted from Pitt et al.,<sup>7</sup> reprinted with permission from University of  
 193 California Press, Copyright © 2022 (<https://creativecommons.org/licenses/by/4.0/>).

## 194 **S4: Inverse modelling**

195 The outer d01 and nested d03 domains are shown in Figure S4.1. The higher resolution within  
196 the d03 domain can clearly be seen. The timeseries of modelled mole fractions ( $\lambda \mathbf{Y}_{mod}$ ) only  
197 includes contributions from within the model domains (i.e., both d01 and d03). It is therefore  
198 necessary to estimate the measured mole fraction enhancements that are solely attributable to  
199 emissions within these domains ( $\mathbf{y}_{enh}$ ), so that the difference between the two can be used in the  
200 cost function (equation 1 in the main manuscript). This is achieved by subtracting a background  
201 term from the measured mole fraction timeseries ( $\mathbf{y}_{tot}$ ), representing all other influences on this  
202 measured timeseries, according to the following equation:

$$203 \mathbf{y}_{enh} = \mathbf{y}_{tot} - (\bar{\mathbf{y}}_{bg} - \overline{(\lambda_b \mathbf{Y}_{mod})_{bg}}) \quad (\text{S1})$$

204 Here  $\bar{\mathbf{y}}_{bg}$  is the average measured mole fraction taken over a set of points defined as  
205 “background points”, and  $\overline{(\lambda_b \mathbf{Y}_{mod})_{bg}}$  is the average modelled mole fraction taken over a set of  
206 background points. The term  $\overline{(\lambda_b \mathbf{Y}_{mod})_{bg}}$  is required to account for the influence of sources within  
207 the model domains on  $\bar{\mathbf{y}}_{bg}$ . These background points are selected so as to minimise the influence  
208 of emission sources within the domains on the measured and modelled mole fractions at these  
209 points, while avoiding outlier points (e.g., those impacted by entrainment of free-tropospheric air  
210 during a given minute of the flight). Therefore, the background points for  $\bar{\mathbf{y}}_{bg}$  are defined as all  
211 points whose mole fractions lie between the 1<sup>st</sup> and 5<sup>th</sup> percentiles of the measured timeseries.  
212 Similarly the background points for  $\overline{(\lambda_b \mathbf{Y}_{mod})_{bg}}$  are defined as all points whose mole fractions lie  
213 between the 1<sup>st</sup> and 5<sup>th</sup> percentiles of the modelled timeseries. This definition corresponds to one  
214 of the sensitivity tests conducted by Pitt et al.;<sup>7</sup> in this study it was found to yield very similar  
215 posterior results to the base case (under which a single set of background points was defined). See  
216 Pitt et al.<sup>7</sup> for further discussion of the different possible background choices and the corresponding  
217 sensitivity test results.

218

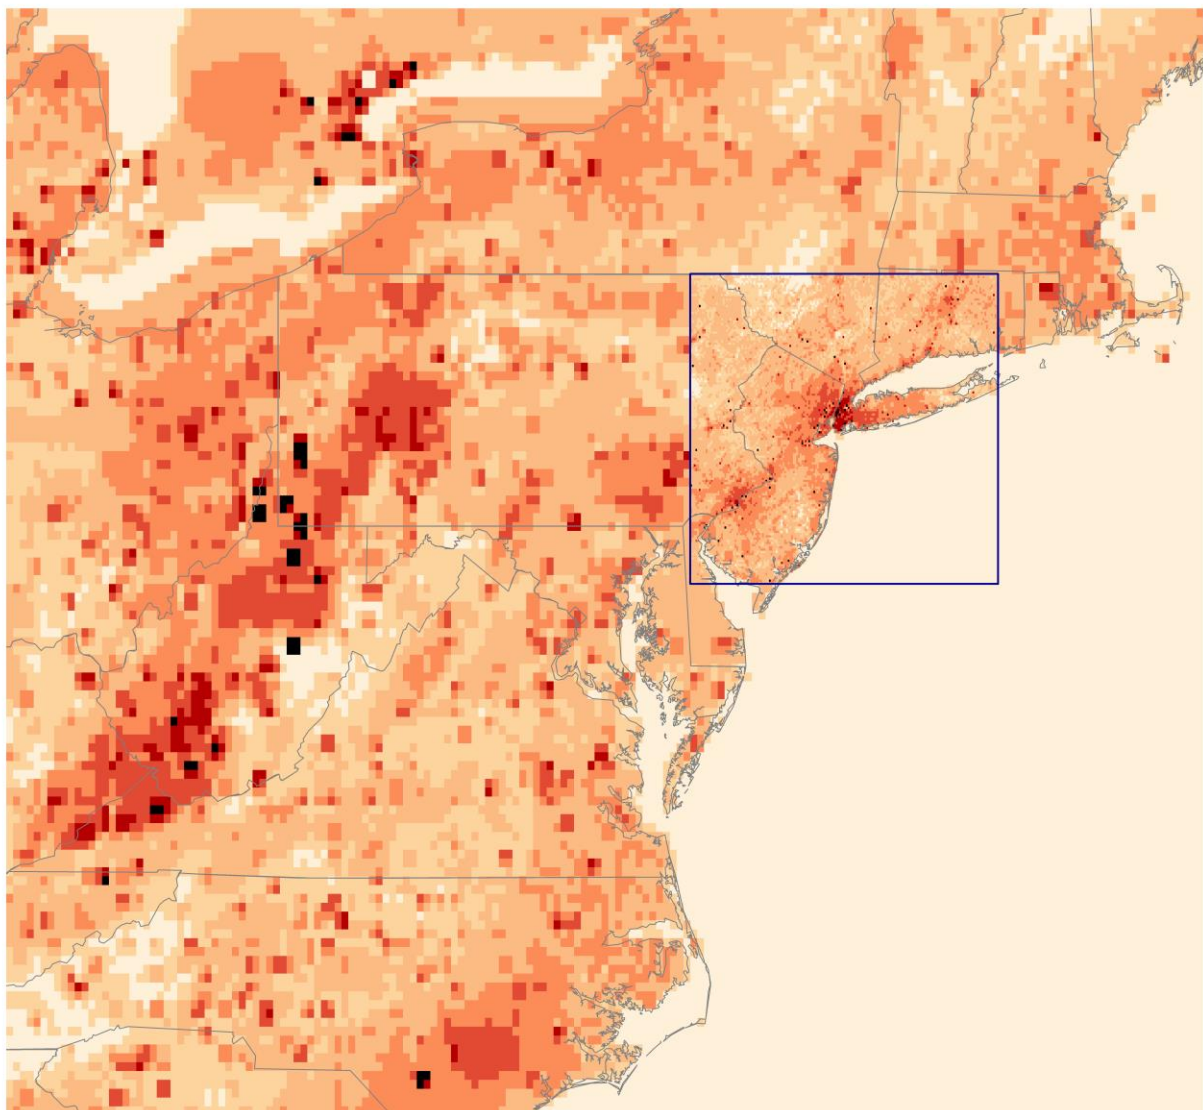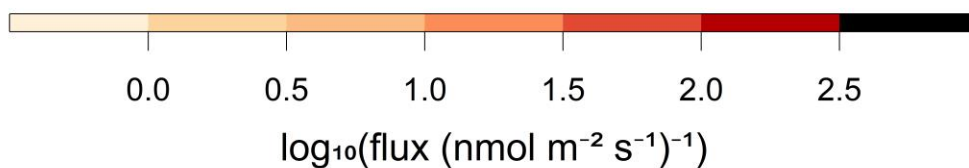

219 **Figure S4.1:** A map showing fluxes within the d01 domain (entire plot) and the d03 domain (blue  
220 box). The high-resolution inventory version shown here is version HRB.  
221



## 222 S5: Results and sensitivity tests

223 Emission maps for individual sectors are shown in Figures S5.1 and S5.2. Note that a log scale  
224 is used so that the spatial patterns of smaller sources can also be seen.

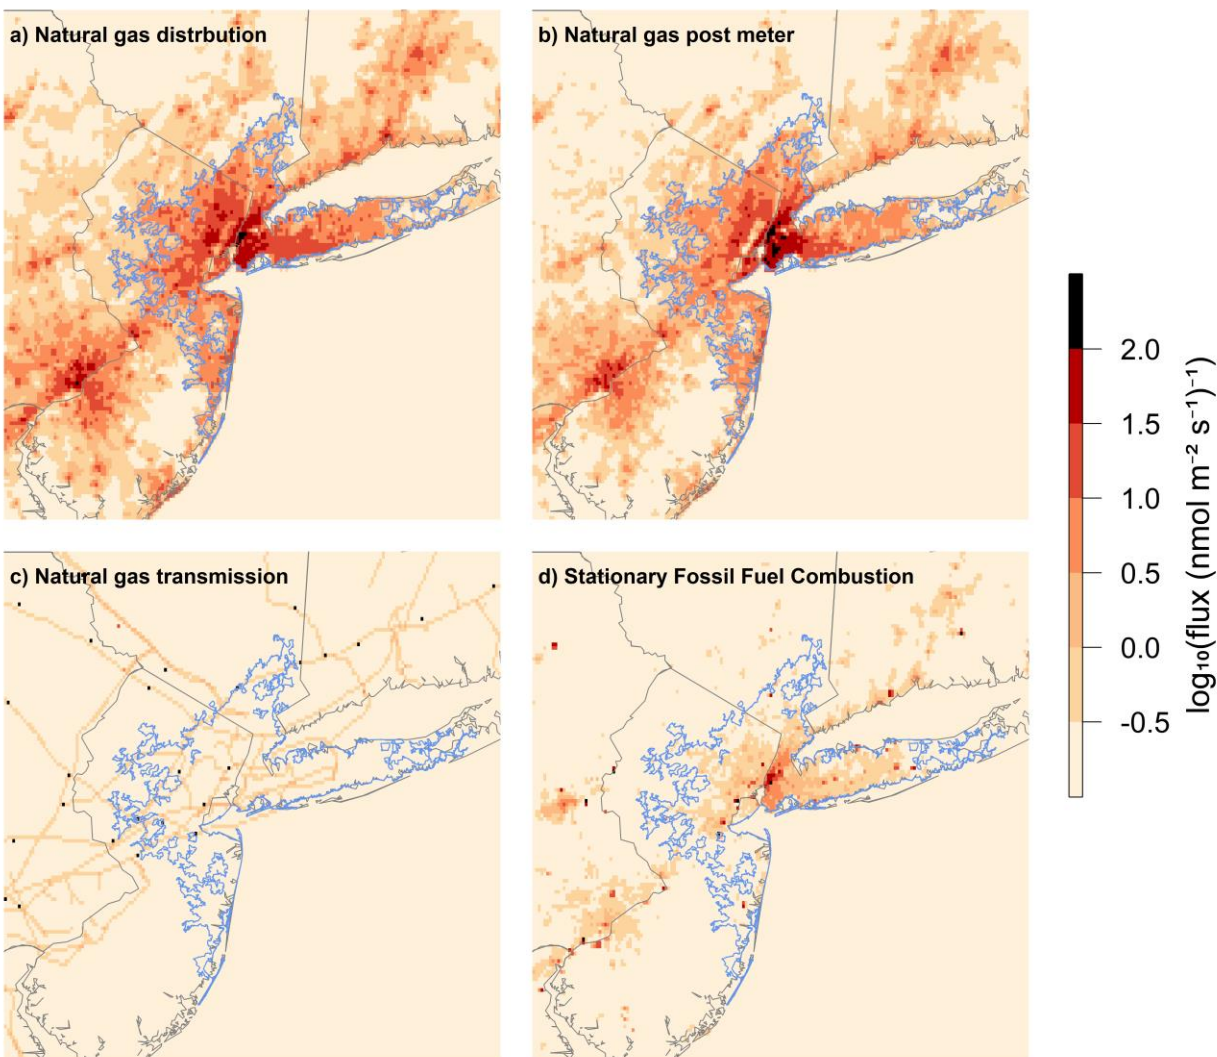

225 **Figure S5.1:** Panel plot showing flux maps for the individual thermogenic sectors. All plots show  
226 fluxes on a logarithmic scale. The NY-UA outline is shown in blue. The high-resolution inventory  
227 version shown here is version HRB.

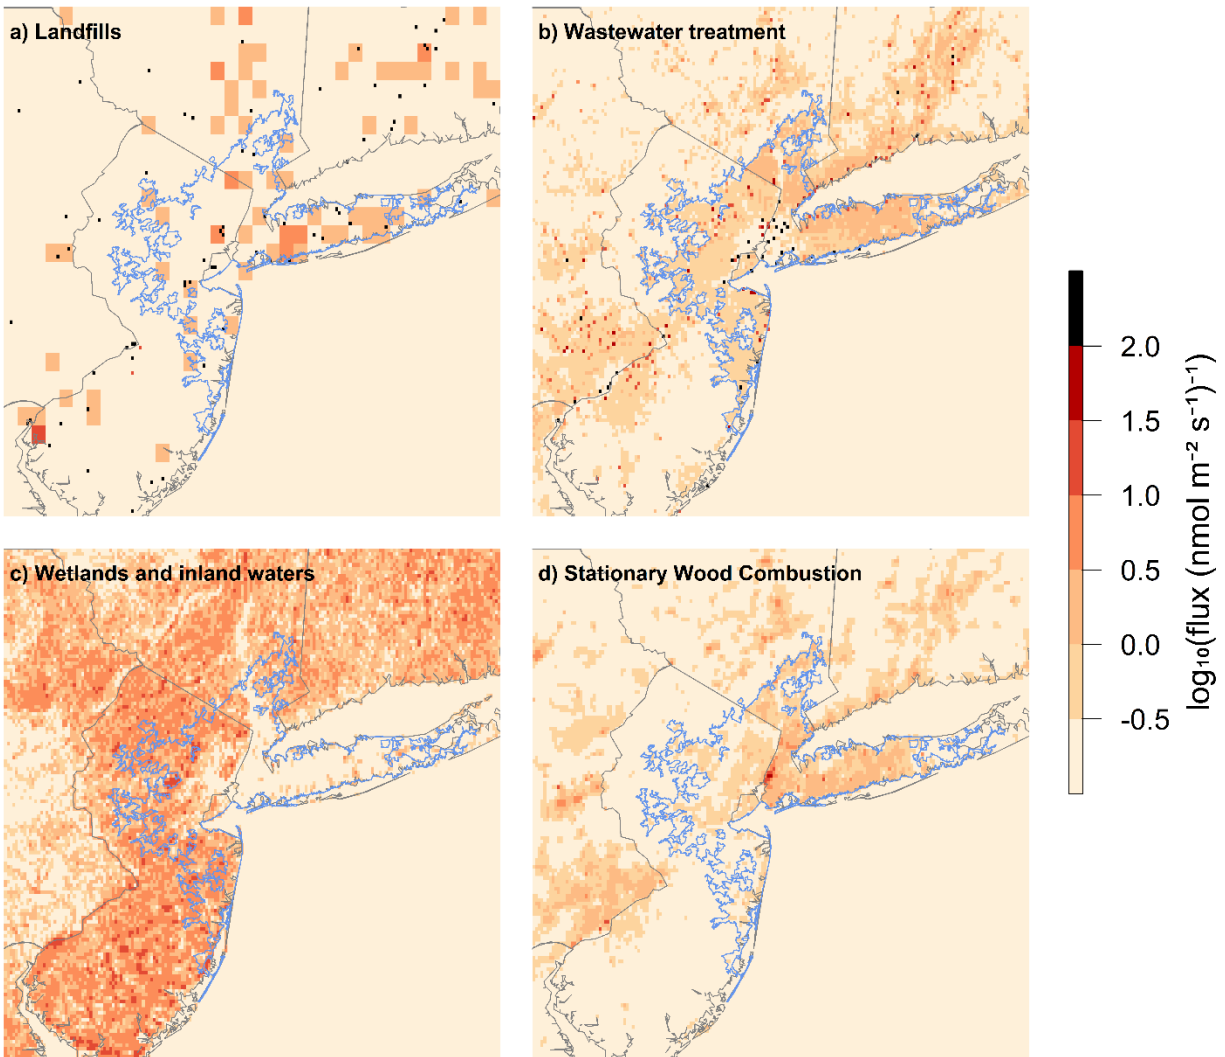

228 **Figure S5.2:** Panel plot showing flux maps for the individual non-thermogenic sectors. All plots  
 229 show fluxes on a logarithmic scale. The NY-UA outline is shown in blue. The high-resolution  
 230 inventory version shown here is version HRB.

231 A comparison of emission rates for the New York-Newark urban area (NY-UA) based on the  
 232 GEPA, the high-resolution inventory (four versions) and the posterior sectoral and spatial  
 233 inversion results is shown in Figure S5.3. The thermogenic fraction is also shown in all cases  
 234 where available. The inventory totals by sector are also given in Table S5.1.  
 235

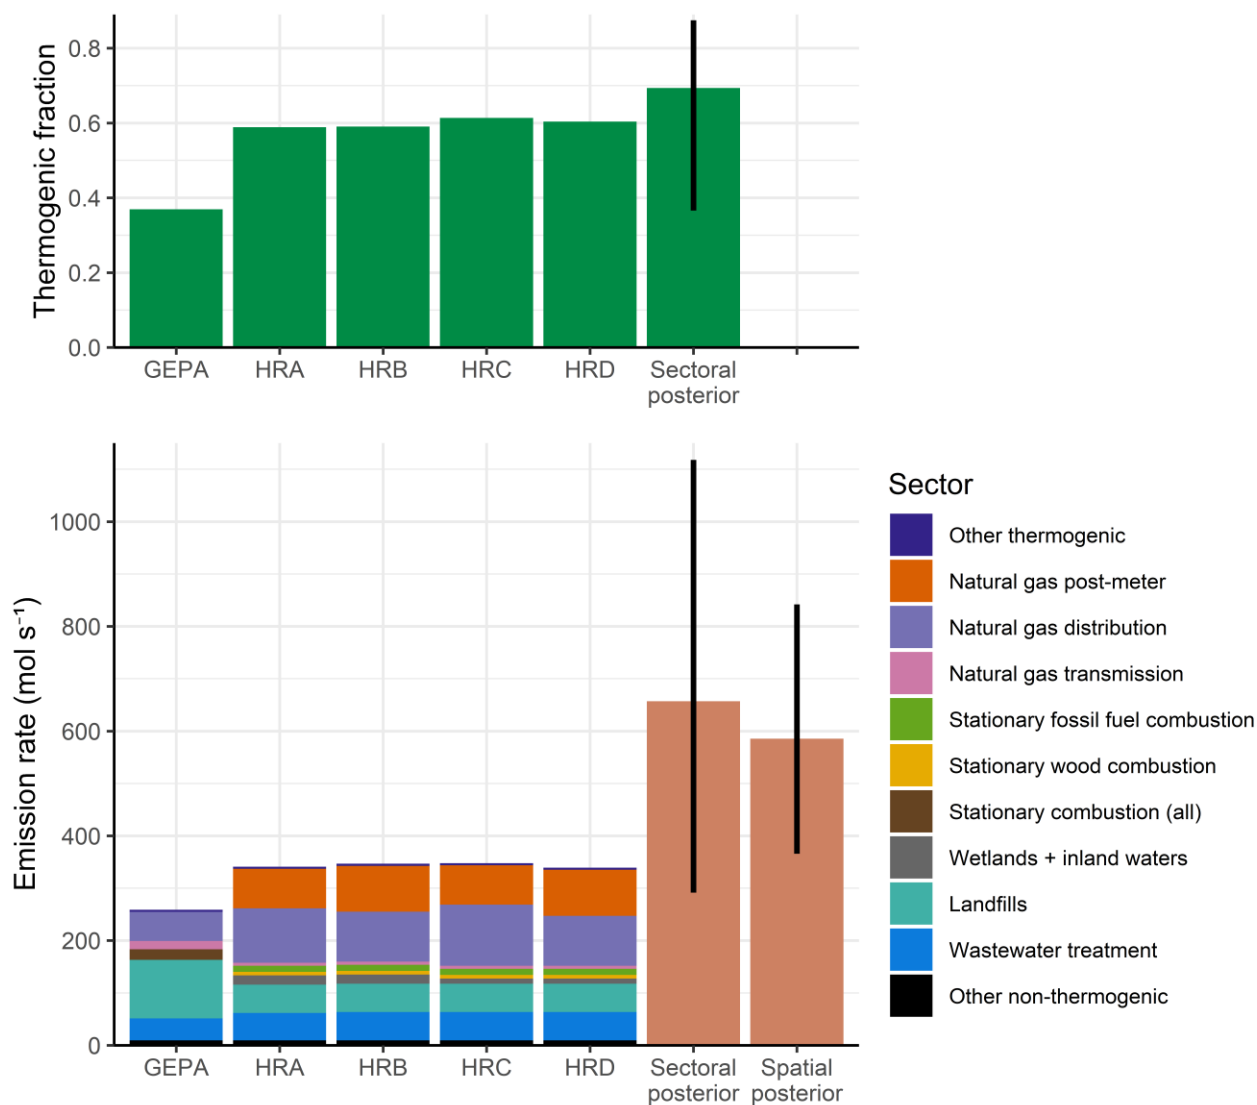

236 **Figure S5.3:** Thermogenic emission fraction (upper panel) and total emission rate (lower panel)  
 237 for the NY-UA. Values are shown for the GEPA, four versions of the high-resolution inventory  
 238 and the posterior results of both inversions. Error bars represent flight-to-flight variability for the  
 239 posterior results, calculated as 95 % confidence intervals.

|                                   | GEPA          | HRA           | HRB           | HRC           | HRD           |
|-----------------------------------|---------------|---------------|---------------|---------------|---------------|
| Natural gas post-meter            | N/A           | 75.50         | 87.49         | 75.22         | 87.93         |
| Natural gas distribution          | 55.58         | 103.72        | 95.41         | 116.61        | 95.25         |
| Natural gas transmission          | 16.05         | 5.95          | 5.95          | 5.95          | 5.95          |
| Stationary fossil fuel combustion |               | 11.47         | 11.68         | 11.47         | 11.47         |
| Stationary wood combustion        | 19.93         | 6.94          | 6.93          | 6.94          | 6.94          |
| Wetlands + inland waters          | N/A           | 17.45         | 17.45         | 9.86          | 9.86          |
| Landfills                         | 112.00        | 54.26         | 54.26         | 54.26         | 54.26         |
| Wastewater treatment              | 41.77         | 52.18         | 53.92         | 53.92         | 53.92         |
| Other thermogenic                 | 4.10          | 4.10          | 4.10          | 4.10          | 4.10          |
| Other non-thermogenic             | 9.49          | 9.49          | 9.49          | 9.49          | 9.49          |
| <b>Total</b>                      | <b>258.91</b> | <b>341.06</b> | <b>346.68</b> | <b>347.82</b> | <b>339.18</b> |

240 **Table S5.1:** Sectoral emission totals in mol s<sup>-1</sup> for the NY-UA according to the GEPA and four  
241 versions of the high-resolution inventory. Note that the GEPA does not separate stationary  
242 combustion by fossil fuel and wood, so the combined total is reported here.

243

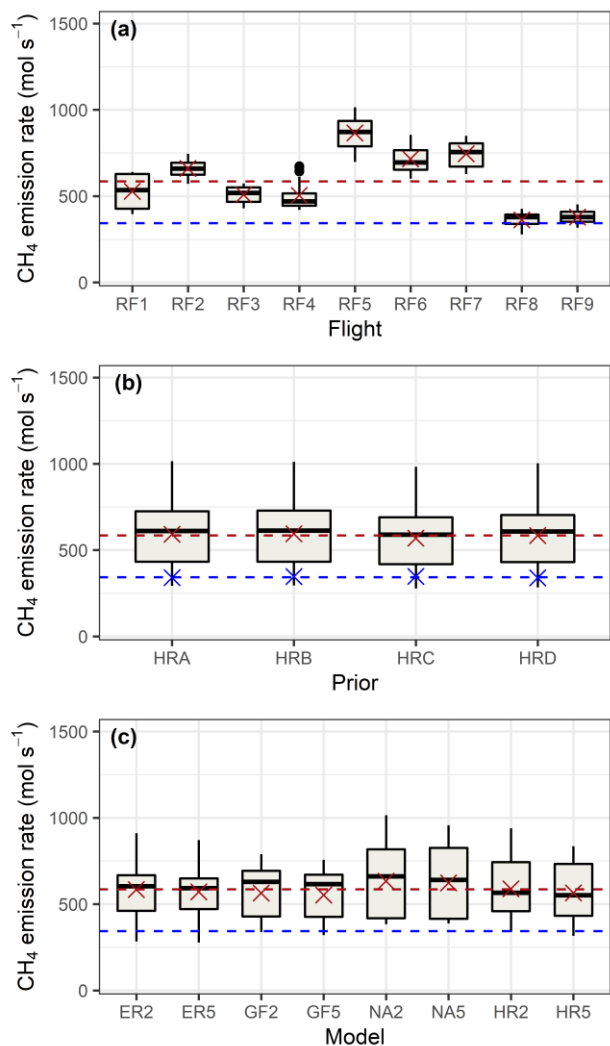

244 **Figure S5.4:** Posterior spatial inversion emission rates for the NY-UA, broken down by: (a) flight,  
 245 (b) prior and (c) transport model. Mean posterior results for each boxplot are shown as red crosses,  
 246 with the overall mean shown as a dashed red line. Mean prior values are shown in blue following  
 247 the same convention. Transport models are labelled as follows: ER is ERA5, GF is GFS, HR is  
 248 HRRR, and NA is NAM. The 2 and 5 represent the Kantha and Clayson<sup>29</sup> and Hanna<sup>30</sup> turbulence  
 249 parameterisations, respectively. Boxplot convention follows Pitt et al.<sup>7</sup>: “The boxes extend  
 250 between the upper and lower quartiles, with the median values shown as solid horizontal black  
 251 bars. The whiskers extend to the highest and lowest data points within 1.5 times the interquartile  
 252 range of the upper and lower quartiles, respectively. All data outside these whiskers are shown as  
 253 individual points.”

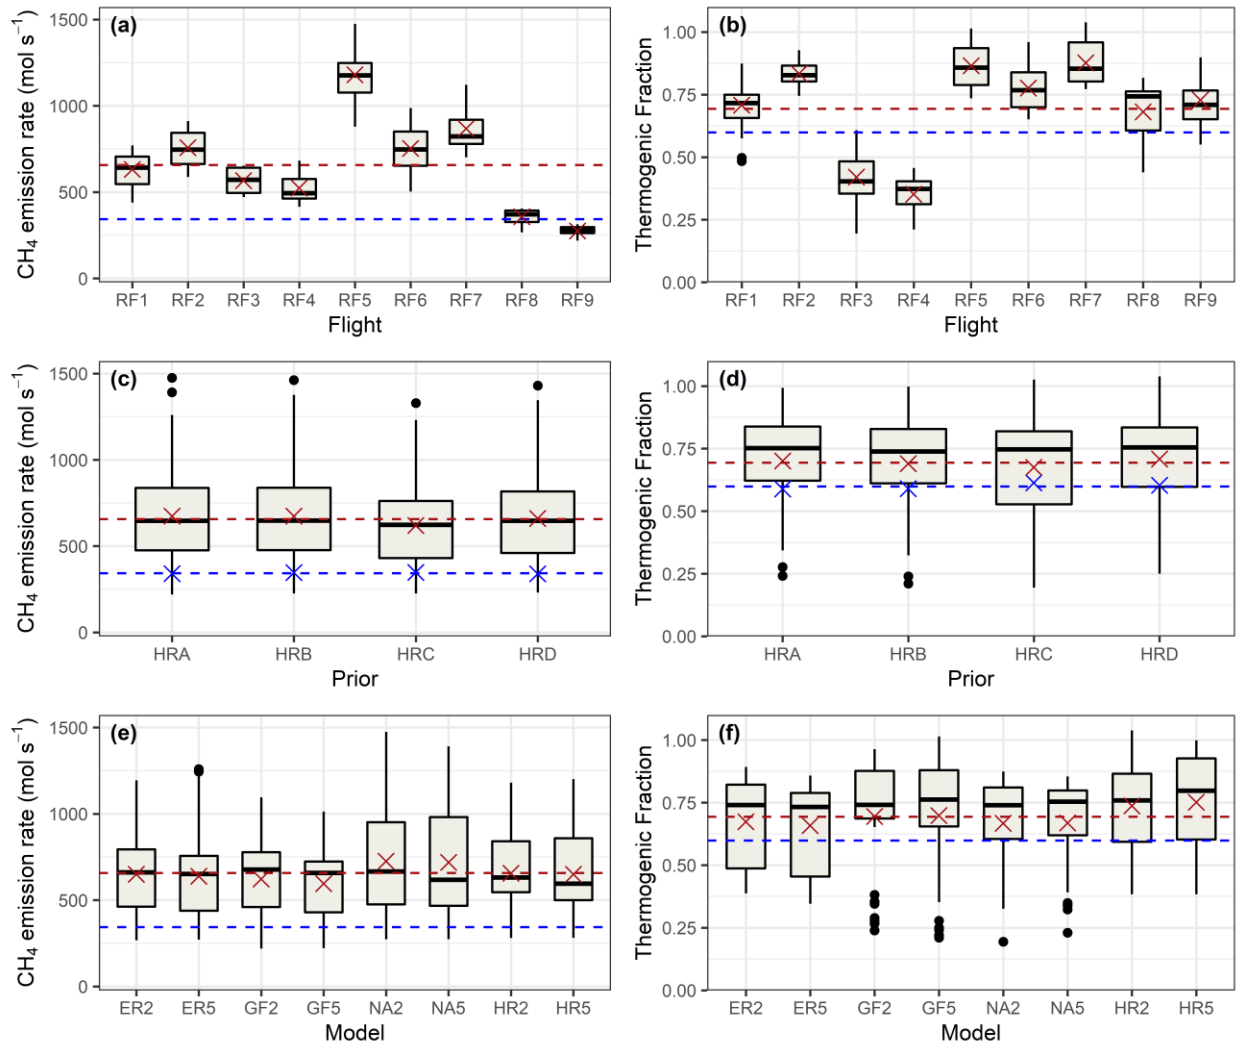

254 **Figure S5.5:** Posterior sectoral inversion results for the NY-UA. Panels (a, c, e) show total  
 255 emission rates, while panels (b, d, f) show the fraction of emissions from thermogenic sources.  
 256 Mean posterior results for each boxplot are shown as red crosses, with the overall mean shown as  
 257 a dashed red line. Mean prior values are shown in blue following the same convention. Transport  
 258 models are labelled as follows: ER is ERA5, GF is GFS, HR is HRRR, and NA is NAM. The 2  
 259 and 5 represent the Kantha and Clayson<sup>29</sup> and Hanna<sup>30</sup> turbulence parameterisations, respectively.  
 260 Boxplot convention is described in the caption of Figure S5.4.

## 261 **Statistical analysis of prior and posterior timeseries**

262 We calculated several statistics (correlation coefficient, mean difference, standard deviation of  
263 the difference) to assess the agreement between the measured enhancements and the modelled  
264 timeseries based on the prior, sectoral posterior and spatial posterior emission maps. The measured  
265 enhancements correspond to  $y_{enh}$  from equation S1, and the modelled timeseries include  
266 contributions from both the d01 and d03 domains. When calculating the posterior modelled  
267 timeseries, one can either multiply the footprints for each transport model by the specific posterior  
268 emission map derived using that transport model, or one can use the transport-model-average  
269 posterior emission map for all footprints. Statistics calculated using both of these approaches are  
270 shown in Figure S5.6. In both cases the posterior timeseries calculated using the different transport  
271 model footprints are averaged for each flight, so that each individual box represents only the spread  
272 in a given statistic across the nine flights.

273 It is clear from these results that the posterior emission maps derived using both inversion  
274 approaches reduce the mean difference between the modelled timeseries and the measured  
275 enhancements relative to the prior. Overall they also reduce the standard deviation of this  
276 difference. The spatial posterior yields a higher correlation coefficient than the prior and the  
277 sectoral posterior. This can be expected, because the spatial inversion has greater freedom to  
278 spatially redistribute emissions relative to the sectoral inversion, so likely yields a more accurate  
279 posterior representation of the spatial distribution of emissions. Conversely, information regarding  
280 the relative magnitude of thermogenic and non-thermogenic emissions is lost in the spatial  
281 posterior, but retained in the sectoral posterior.

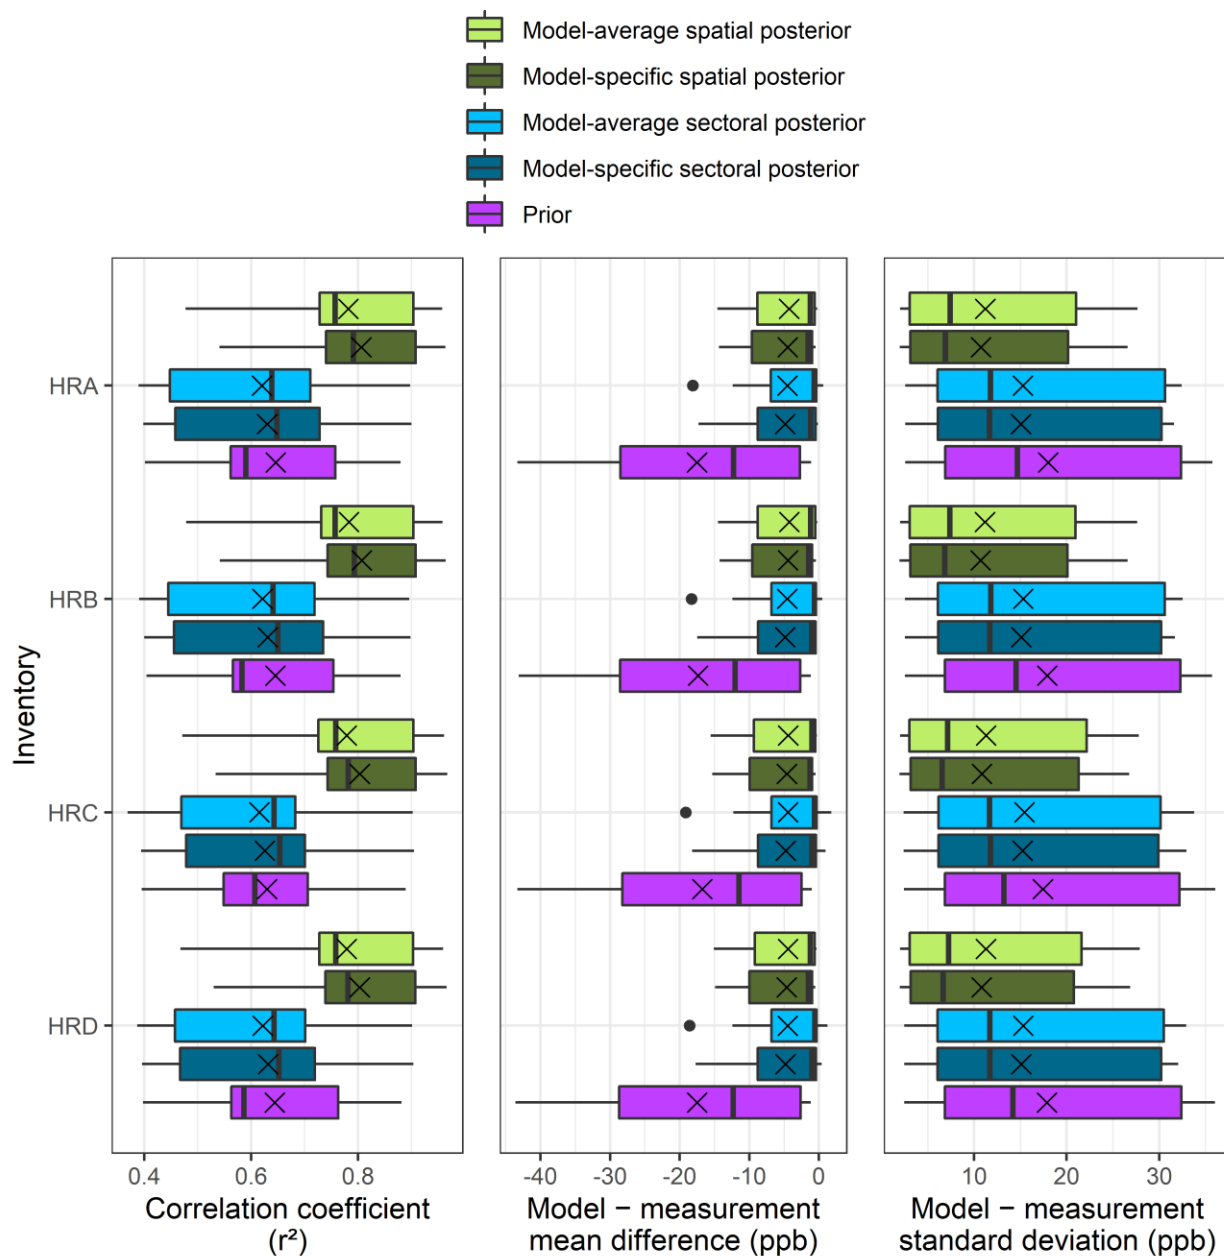

282

283 **Figure S5.6:** Statistics showing the difference between the measured enhancements and the  
 284 modelled timeseries calculated using the prior, sectoral posterior and spatial posterior emission  
 285 maps. The posterior emission maps are calculated by multiplying the footprint for each transport  
 286 model by either the transport-model-specific posterior emission map, or the transport-model-  
 287 average posterior emission map. The resulting posterior timeseries are then averaged across all  
 288 transport models in both cases, such that each box represents only the spread in a given statistic  
 289 across the nine flights.



### 290 **Sensitivity test 1 – prior uncertainty**

291 We conducted a sensitivity test to assess the impact of the prescribed prior uncertainty on the  
292 posterior results of the sectoral inversion. In the base case described in the main text, the prior  
293 uncertainty on the scaling factor for all three model components (urban area thermogenic, urban  
294 area non-thermogenic and outside contribution) was set to 0.5, representing a  $1\sigma$  uncertainty of 50  
295 % for each component. Our sensitivity test involved two alternative choices for this parameter:  
296 0.25 and 1.0.

297 When the uncertainty on the prior scaling factor was set to 0.25, the posterior emission estimate  
298 was  $(610 \pm 226) \text{ mol s}^{-1}$ , and the posterior thermogenic fraction was  $0.66 \pm 0.09$  (uncertainty  
299 quoted as  $1\sigma$  flight-to-flight variability in all cases). Using a prior scaling factor uncertainty of 1.0  
300 yielded posterior estimates for total emissions and thermogenic fraction of  $(670 \pm 285) \text{ mol s}^{-1}$  and  
301  $0.75 \pm 0.30$  respectively. Comparing these to our base case estimates of  $(657 \pm 273) \text{ mol s}^{-1}$  and  
302  $0.69 \pm 0.19$ , it can be seen that larger, and more variable, estimates of posterior emissions and  
303 posterior thermogenic fraction were obtained when the prior constraints were relaxed (i.e., a larger  
304 prior uncertainty is used), as one would expect. However, the fact that the variability in the mean  
305 result induced by this choice is less than 8 % in all cases is an encouraging sign that the overall  
306 conclusions of this study are robust to reasonable changes in the specification of this parameter.

307

### 308 **Sensitivity test 2 – CO<sub>2</sub> proxies**

309 The publicly available version of ACES v2.0<sup>31</sup> was released during the writing of this manuscript  
310 – the analysis presented in this study used a pre-release version with some small differences. The  
311 Vulcan inventory used in this study is the annual version of Vulcan v3.0<sup>32</sup> – there is also an hourly  
312 version of Vulcan v3.0<sup>33</sup> available, whose annual totals are slightly different. We wanted to test if  
313 the main ensemble of priors used in our manuscript sufficiently represented the uncertainties in  
314 input data, so as to cover the small differences between these ACES and Vulcan versions. Thus,  
315 we created two additional inventory versions using the publicly available ACES v2.0 and the  
316 annual average of the hourly Vulcan v3.0. Both versions used LDC-level emissions for natural gas  
317 distribution (AL/VL), state-level emissions for stationary combustion (AS1/VS1) and national  
318 emissions for onsite wastewater treatment (SN). These specific combinations were chosen because  
319 they were the combinations that displayed the largest differences relative to the corresponding  
320 priors used in our original analysis (i.e. they represented the “worst case scenario”). The emission

321 rate for one compressor station was also updated in these new versions. These two anthropogenic  
322 versions were combined with the two different versions for wetlands and inland waters used in the  
323 main manuscript (S1 and WC), to create a total of four new versions for this sensitivity test.

324 We repeated our inverse modelling analysis using these four revised inventory versions, to test  
325 the impact on the posterior results and thus check if the uncertainty provided by the ensemble  
326 approach used is an appropriate representation of real uncertainties in bottom-up proxy data. We  
327 found that for the sectoral inversion, the results show a mere 1.27 % difference in total emissions  
328 and a 1.65 % difference in thermogenic fraction (referenced to the paper mean values), with both  
329 numbers well below the  $1\sigma$  variabilities across priors of the original ensemble (3.9 % in total  
330 emissions and 2.1 % in thermogenic fraction). In addition, the correlation ( $r^2$ ) among daily  
331 averages was 0.9999 for the total emissions and 0.9983 for the thermogenic fractions. Similarly,  
332 for the spatial inversion we found a 0.5 % difference in total emissions and a correlation ( $r^2$ ) among  
333 daily averages of 0.9999. These results demonstrate that the prior ensemble approach, and the  
334 original ensemble members used, provided a good representation of the expected uncertainties due  
335 to activity data and spatial proxies (at least those coming from reasonable data updates as those  
336 seen in ACES and Vulcan).

337 **References**

- 338 (1) Maasakkers, J. D.; Jacob, D. J.; Sulprizio, M. P.; Turner, A. J.; Weitz, M.; Wirth, T.; Hight,  
339 C.; DeFigueiredo, M.; Desai, M.; Schmeltz, R.; Hockstad, L.; Bloom, A. A.; Bowman, K.  
340 W.; Jeong, S.; Fischer, M. L. Gridded National Inventory of U.S. Methane Emissions.  
341 *Environ. Sci. Technol.* **2016**, *50* (23), 13123–13133.  
342 <https://doi.org/10.1021/acs.est.6b02878>.
- 343 (2) EPA. *Inventory of U.S. Greenhouse Gas Emissions and Sinks: 1990-2019*; EPA, 2021.
- 344 (3) EIA. Natural Gas Interstate and Intrastate Pipelines  
345 [https://www.eia.gov/maps/map\\_data/NaturalGas\\_InterIntrastate\\_Pipelines\\_US\\_EIA.zip](https://www.eia.gov/maps/map_data/NaturalGas_InterIntrastate_Pipelines_US_EIA.zip)  
346 (accessed May 28, 2021).
- 347 (4) US Fish & Wildlife Service. National Wetlands Inventory  
348 <https://www.fws.gov/program/national-wetlands-inventory/data-download> (accessed Jun  
349 4, 2021).
- 350 (5) Rosentreter, J. A.; Borges, A. V.; Deemer, B. R.; Holgerson, M. A.; Liu, S.; Song, C.;  
351 Melack, J.; Raymond, P. A.; Duarte, C. M.; Allen, G. H.; Olefeldt, D.; Poulter, B.; Battin,  
352 T. I.; Eyre, B. D. Half of Global Methane Emissions Come from Highly Variable Aquatic  
353 Ecosystem Sources. *Nat. Geosci.* **2021**, *14* (4), 225–230. [https://doi.org/10.1038/s41561-](https://doi.org/10.1038/s41561-021-00715-2)  
354 [021-00715-2](https://doi.org/10.1038/s41561-021-00715-2).
- 355 (6) McDonald, C. P.; Rover, J. A.; Stets, E. G.; Striegl, R. G. The Regional Abundance and  
356 Size Distribution of Lakes and Reservoirs in the United States and Implications for  
357 Estimates of Global Lake Extent. *Limnol. Oceanogr.* **2012**, *57* (2), 597–606.  
358 <https://doi.org/10.4319/lo.2012.57.2.0597>.
- 359 (7) Pitt, J. R.; Lopez-Coto, I.; Hajny, K. D.; Tomlin, J.; Kaeser, R.; Jayarathne, T.; Stirm, B.  
360 H.; Floerchinger, C. R.; Loughner, C. P.; Gately, C. K.; Hutyra, L. R.; Gurney, K. R.; Roest,  
361 G. S.; Liang, J.; Gourjji, S.; Karion, A.; Whetstone, J. R.; Shepson, P. B. New York City  
362 Greenhouse Gas Emissions Estimated with Inverse Modeling of Aircraft Measurements.  
363 *Elem. Sci. Anthr.* **2022**, *10* (1), 1–13. <https://doi.org/10.1525/elementa.2021.00082>.
- 364 (8) Zhuang, J. XESMF: Universal Regridder for Geospatial Data. 2020.  
365 <https://doi.org/10.5281/zenodo.1134365>.
- 366 (9) Bloom, A. A.; Bowman, K. W.; Lee, M.; Turner, A. J.; Schroeder, R.; Worden, J. R.;  
367 Weidner, R. J.; McDonald, K. C.; Jacob, D. J. CMS: Global 0.5-deg Wetland Methane

- 368 Emissions and Uncertainty (WetCHARTs v1.3.1).  
369 <https://doi.org/10.3334/ORNLDAAC/1915>.
- 370 (10) Government of Canada; Natural Resources Canada; Canada Centre for Remote Sensing.  
371 2015 Land Cover of Canada <https://open.canada.ca/data/en/dataset/4e615eae-b90c-420b-adee-2ca35896caf6> (accessed Jan 29, 2023).
- 372
- 373 (11) Bridgham, S. D.; Megonigal, J. P.; Keller, J. K.; Bliss, N. B.; Trettin, C. Wetlands -  
374 Supplemental Materials. In *The First State of the Carbon Cycle Report (SOCCR): The North  
375 American Carbon Budget and Implications for the Global Carbon Cycle*; King, A. W.,  
376 Dilling, L., Zimmerman, G. P., Fairman, D. M., Houghton, R. A., Marland, G., Rose, A. Z.,  
377 Wilbanks, T. J., Eds.; National Oceanic and Atmospheric Administration, National Climatic  
378 Data Center: Asheville, NC, USA, 2007; pp 177–192.
- 379 (12) Kolka, R.; Trettin, C.; Tang, W.; Krauss, K.; Bansal, S.; Drexler, J.; Wickland, K.; Chimner,  
380 R.; Hogan, D.; Pindilli, E. J.; Benscoter, B.; Tangen, B.; Kane, E.; Bridgham, S.;  
381 Richardson, C. Terrestrial Wetlands. In *Second State of the Carbon Cycle Report  
382 (SOCCR2): A Sustained Assessment Report*; Cavallaro, N., Shrestha, G., Birdsey, R.,  
383 Mayes, M. A., Najjar, R. G., Reed, S. C., Romero-Lankao, P., Zhu, Z., Eds.; U.S. Global  
384 Change Research Program: Washington, DC, USA, 2018; pp 507–567.  
385 <https://doi.org/10.7930/SOCCR2.2018.Ch13>.
- 386 (13) Windham-Myers, L.; Cai, W.-J.; Alin, S. R.; Andersson, A.; Crosswell, J.; Dunton, K. H.;  
387 Hernandez-Ayon, J. M.; Herrmann, M.; Hinson, A. L.; Hopkinson, C. S.; Howard, J.; Hu,  
388 X.; Knox, S. H.; Kroeger, K.; Lagomasino, D.; Megonigal, P.; Najjar, R. G.; Paulsen, M.-  
389 L.; Peteet, D.; Pidgeon, E.; Schäfer, K. V. R.; Tzortziou, M.; Wang, Z. A.; Watson, E. B.  
390 Tidal Wetlands and Estuaries. In *Second State of the Carbon Cycle Report (SOCCR2): A  
391 Sustained Assessment Report*; Cavallaro, N., Shrestha, G., Birdsey, R., Mayes, M. A.,  
392 Najjar, R. G., Reed, S. C., Romero-Lankao, P., Zhu, Z., Eds.; U.S. Global Change Research  
393 Program: Washington, DC, USA, 2018; pp 596–648.  
394 <https://doi.org/10.7930/SOCCR2.2018.Ch15>.
- 395 (14) US Census Bureau. Annual Estimates of the Resident Population for the United States,  
396 Regions, States, and Puerto Rico: April 1, 2010 to July 1, 2019 (NST-EST2019-01)  
397 [https://www2.census.gov/programs-surveys/popest/tables/2010-2019/state/totals/nst-  
398 est2019-01.xlsx](https://www2.census.gov/programs-surveys/popest/tables/2010-2019/state/totals/nst-est2019-01.xlsx) (accessed Jun 14, 2021).

- 399 (15) US Census Bureau. American Housing Survey [https://www.census.gov/programs-](https://www.census.gov/programs-surveys/ahs/data/interactive/ahstablecreator.html)  
400 [surveys/ahs/data/interactive/ahstablecreator.html](https://www.census.gov/programs-surveys/ahs/data/interactive/ahstablecreator.html) (accessed Jun 15, 2021).
- 401 (16) US Census Bureau. Historical Census of Housing Tables: Sewage Disposal  
402 <https://www.census.gov/data/tables/time-series/dec/coh-sewage.html> (accessed Jun 11,  
403 2021).
- 404 (17) Weller, Z. D.; Hamburg, S. P.; von Fischer, J. C. A National Estimate of Methane Leakage  
405 from Pipeline Mains in Natural Gas Local Distribution Systems. *Environ. Sci. Technol.*  
406 **2020**, *54* (14), 8958–8967. <https://doi.org/10.1021/acs.est.0c00437>.
- 407 (18) Fischer, M. L.; Chan, W. R.; Delp, W.; Jeong, S.; Rapp, V.; Zhu, Z. An Estimate of Natural  
408 Gas Methane Emissions from California Homes. *Environ. Sci. Technol.* **2018**, *52* (17),  
409 10205–10213. <https://doi.org/10.1021/acs.est.8b03217>.
- 410 (19) Gómez, D. R.; Watterson, J. D.; Americano, B. B.; Ha, C.; Marland, G.; Matsika, E.;  
411 Namayanga, L. N.; Osman-Elasha, B.; Saka, J. D. K.; Treanton, K. Stationary Combustion.  
412 In *2006 IPCC Guidelines for National Greenhouse Gas Inventories. Volume 2: Energy*;  
413 Eggleston, S., Buendia, L., Miwa, K., Ngara, T., Tanabe, K., Eds.; Institute for Global  
414 Environmental Strategies (IGES): Hayama, Japan, 2006; pp 2.2-2.47.  
415 <https://doi.org/10.1007/BF00914340>.
- 416 (20) Hajny, K. D.; Salmon, O. E.; Rudek, J.; Lyon, D. R.; Stuff, A. A.; Stirm, B. H.; Kaeser, R.;  
417 Floerchinger, C. R.; Conley, S.; Smith, M. L.; Shepson, P. B. Observations of Methane  
418 Emissions from Natural Gas-Fired Power Plants. *Environ. Sci. Technol.* **2019**, *53* (15),  
419 8976–8984. <https://doi.org/10.1021/acs.est.9b01875>.
- 420 (21) EPA. Greenhouse Gas Reporting Program <https://ghgdata.epa.gov> (accessed Apr 16, 2021).
- 421 (22) EPA. Landfill Methane Outreach Program [https://www.epa.gov/lmop/landfill-technical-](https://www.epa.gov/lmop/landfill-technical-data)  
422 [data](https://www.epa.gov/lmop/landfill-technical-data) (accessed Apr 18, 2021).
- 423 (23) EPA. Clean Watersheds Needs Survey [https://ordspub.epa.gov/ords/cwns2012/f?p=241:25:](https://ordspub.epa.gov/ords/cwns2012/f?p=241:25)  
424 (accessed Jun 8, 2021).
- 425 (24) European Commission Joint Research Centre (JRC)/Netherlands Environmental  
426 Assessment Agency (PBL). Emission Database for Global Atmospheric Research  
427 (EDGAR), release version 4.2 <https://edgar.jrc.ec.europa.eu/overview.php?v=42> (accessed  
428 Oct 2, 2020).
- 429 (25) Crippa, M.; Solazzo, E.; Huang, G.; Guizzardi, D.; Koffi, E.; Muntean, M.; Schieberle, C.;

- 430 Friedrich, R.; Janssens-Maenhout, G. High Resolution Temporal Profiles in the Emissions  
431 Database for Global Atmospheric Research. *Sci. Data* **2020**, *7* (1), 121.  
432 <https://doi.org/10.1038/s41597-020-0462-2>.
- 433 (26) European Commission Joint Research Centre (JRC)/Netherlands Environmental  
434 Assessment Agency (PBL). Emission Database for Global Atmospheric Research  
435 (EDGAR), release version 5.0 [https://edgar.jrc.ec.europa.eu/overview.php?v=50\\_GHG](https://edgar.jrc.ec.europa.eu/overview.php?v=50_GHG)  
436 (accessed Oct 2, 2020).
- 437 (27) Crosson, E. R. A Cavity Ring-down Analyzer for Measuring Atmospheric Levels of  
438 Methane, Carbon Dioxide, and Water Vapor. *Appl. Phys. B* **2008**, *92* (3), 403–408.  
439 <https://doi.org/10.1007/s00340-008-3135-y>.
- 440 (28) Dlugokencky, E. J.; Myers, R. C.; Lang, P. M.; Masarie, K. A.; Crotwell, A. M.; Thoning,  
441 K. W.; Hall, B. D.; Elkins, J. W.; Steele, L. P. Conversion of NOAA Atmospheric Dry Air  
442 CH<sub>4</sub> Mole Fractions to a Gravimetrically Prepared Standard Scale. *J. Geophys. Res.* **2005**,  
443 *110* (D18), D18306. <https://doi.org/10.1029/2005JD006035>.
- 444 (29) Kantha, L. H.; Clayson, C. A. *Small Scale Processes in Geophysical Fluid Flows*; Academic  
445 Press: San Diego, 2000.
- 446 (30) Hanna, S. R. Applications in Air Pollution Modelling. In *Atmospheric turbulence and air  
447 pollution modelling*; Nieuwstadt, F. T., Van Dop, H., Eds.; Reidel: Dordrecht, The  
448 Netherlands, 1982; pp 275–310.
- 449 (31) Gately, C.; Hutyra, L. R. Anthropogenic Carbon Emission System, 2012-2017, Version 2.  
450 <https://doi.org/10.3334/ORNLDAAAC/1943>.
- 451 (32) Gurney, K. R.; Liang, J.; Patarasuk, R.; Song, Y.; Huang, J.; Roest., G. Vulcan: High-  
452 Resolution Annual Fossil Fuel CO<sub>2</sub> Emissions in USA, 2010-2015, Version 3.  
453 <https://doi.org/10.3334/ORNLDAAAC/1741>.
- 454 (33) Gurney, K. R.; Liang, J.; Patarasuk, R.; Song, Y.; Huang, J.; Roest., G. Vulcan: High-  
455 Resolution Hourly Fossil Fuel CO<sub>2</sub> Emissions in USA, 2010-2015, Version 3.  
456 <https://doi.org/10.3334/ORNLDAAAC/1810>.
- 457
